# Supplementary material for: A simulation study to examine the impact of recombination on phylogenomic inferences under the multispecies coalescent model
Source: PubMed Central journal article supplement (PMC9321900; doi:10.1111/mec.16433), 2022-04-04
Supplement: MEC-31-2814-s001.pdf [file MEC-31-2814-s001.pdf]

# MOLECULAR ECOLOGY

**Supplemental Information for**

**A simulation study to examine the impact of recombination on inference using genomic sequence data under the multispecies coalescent model**

Tianqi Zhu, Tomáš Flouri, and Ziheng Yang

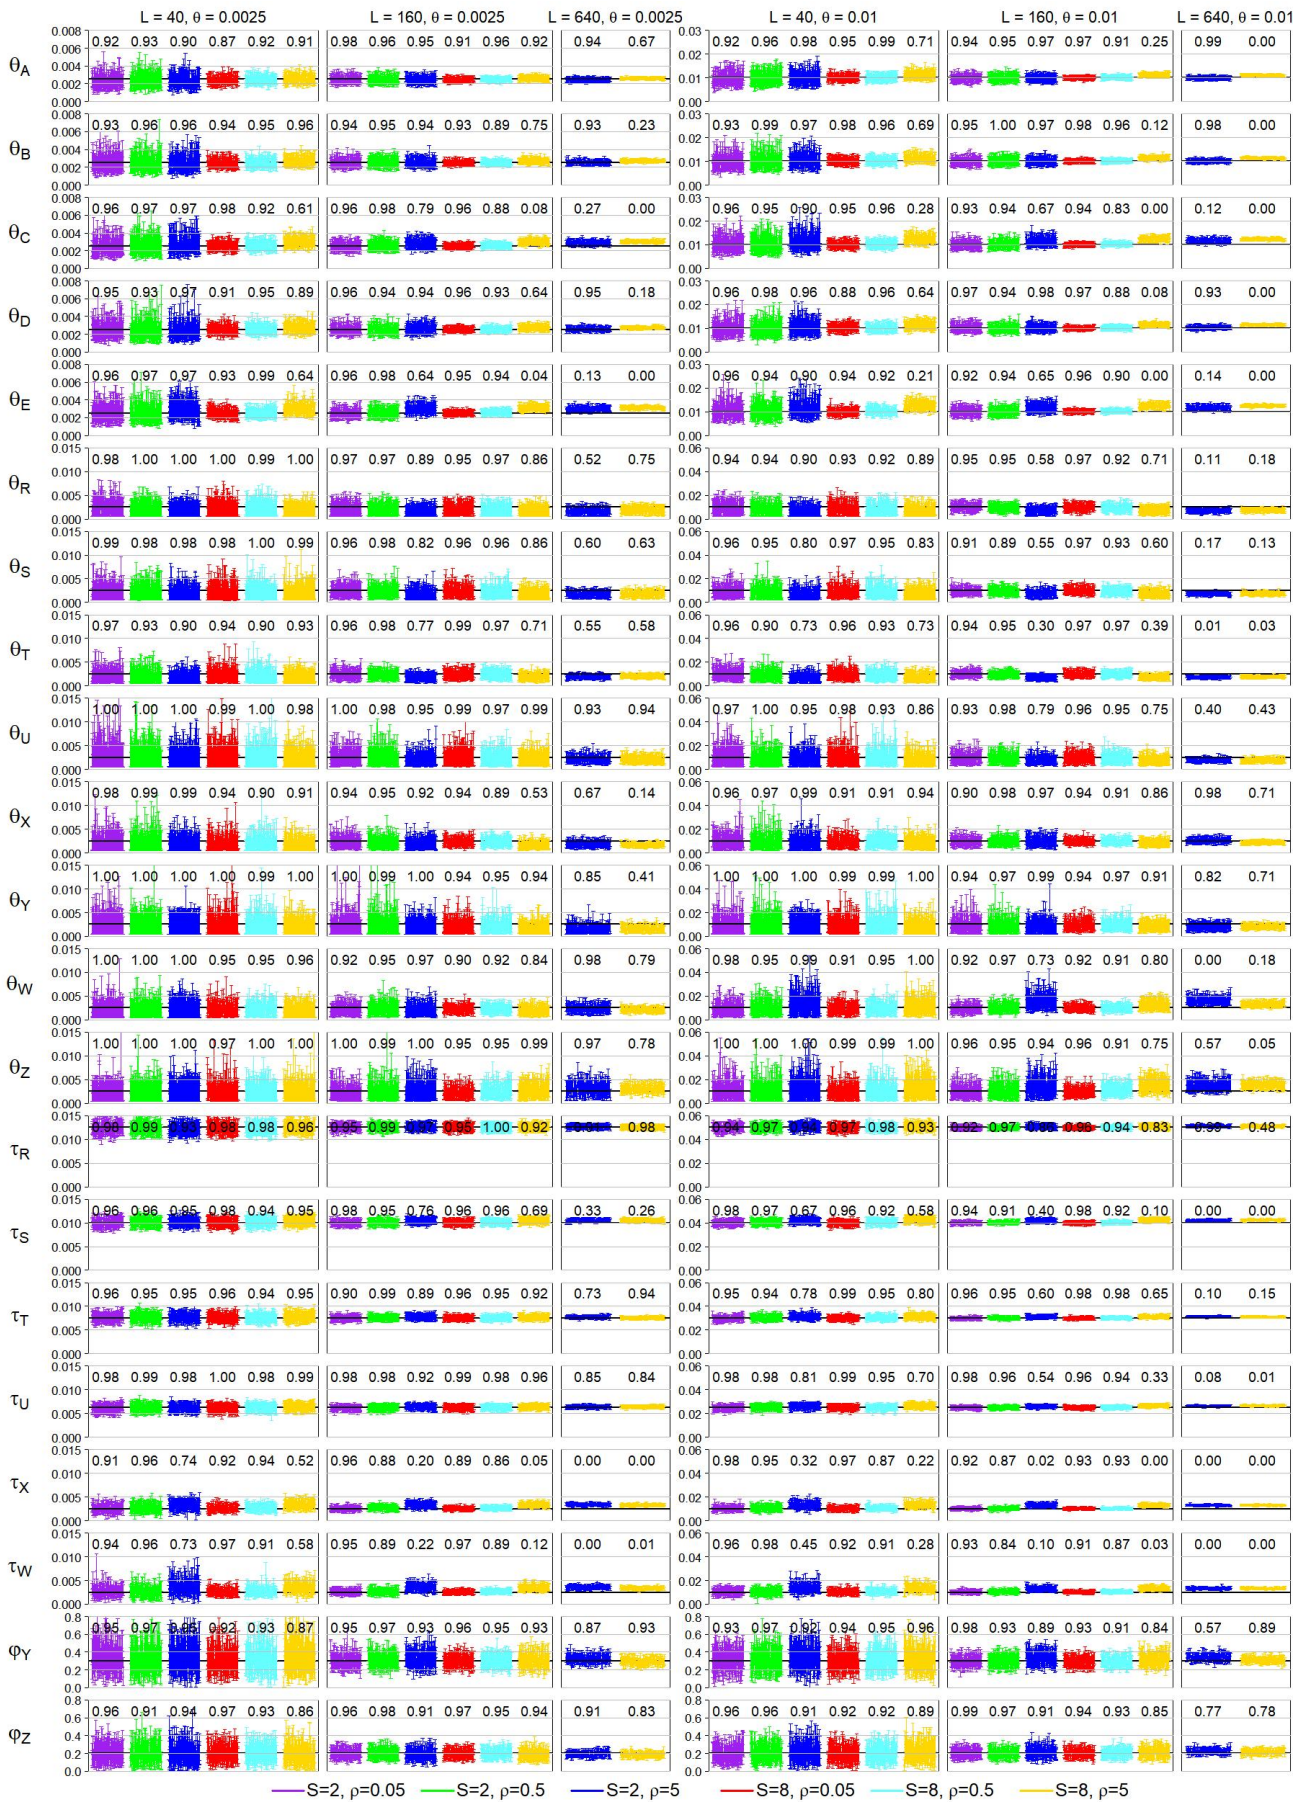

Figure S1. The posterior 95% CIs and CI coverage for parameters under the MSci model for species tree U of figure 3. Simulation for  $L = 640$  loci was done for the high recombination rate ( $\rho = 5$ ) only. See legend to figure 6.



**Table S2. rRMSE of parameter estimates in the A00 analysis under the MSci model**

|                   | $\rho$ | $\theta_A$ | $\theta_B$ | $\theta_C$ | $\theta_D$ | $\theta_E$ | $\theta_R$ | $\theta_S$ | $\theta_T$ | $\theta_U$ | $\theta_X$ | $\theta_Y$ | $\theta_Z$ | $\theta_W$ | $\tau_R$ | $\tau_S$ | $\tau_T$ | $\tau_U$ | $\tau_X = \tau_Y$ | $\tau_Z = \tau_W$ | $\phi_Y$ | $\phi_W$ |
|-------------------|--------|------------|------------|------------|------------|------------|------------|------------|------------|------------|------------|------------|------------|------------|----------|----------|----------|----------|-------------------|-------------------|----------|----------|
| <b>Tree B</b>     |        |            |            |            |            |            |            |            |            |            |            |            |            |            |          |          |          |          |                   |                   |          |          |
| $\theta = 0.0025$ |        |            |            |            |            |            |            |            |            |            |            |            |            |            |          |          |          |          |                   |                   |          |          |
| $S = 2, L = 40$   | 0.05   | 0.20       | 0.23       | 0.22       | 0.23       | 0.22       | 0.26       | 0.32       | 0.27       | 0.37       | 0.31       | 0.27       | 0.28       | 0.36       | 0.04     | 0.06     | 0.06     | 0.06     | 0.21              | 0.28              | 0.22     | 0.30     |
|                   | 0.5    | 0.19       | 0.24       | 0.22       | 0.22       | 0.22       | 0.28       | 0.29       | 0.38       | 0.44       | 0.32       | 0.27       | 0.32       | 0.28       | 0.04     | 0.06     | 0.07     | 0.07     | 0.25              | 0.30              | 0.27     | 0.34     |
|                   | 5      | 0.16       | 0.23       | 0.34       | 0.26       | 0.32       | 0.30       | 0.25       | 0.35       | 0.53       | 0.28       | 0.15       | 0.21       | 0.16       | 0.04     | 0.06     | 0.08     | 0.09     | 0.51              | 0.56              | 0.29     | 0.30     |
| $S = 2, L = 160$  | 0.05   | 0.11       | 0.11       | 0.12       | 0.13       | 0.11       | 0.22       | 0.26       | 0.24       | 0.42       | 0.24       | 0.40       | 0.24       | 0.35       | 0.02     | 0.03     | 0.04     | 0.04     | 0.12              | 0.14              | 0.12     | 0.16     |
|                   | 0.5    | 0.1        | 0.12       | 0.13       | 0.12       | 0.12       | 0.25       | 0.22       | 0.26       | 1.15       | 0.22       | 0.28       | 0.25       | 0.29       | 0.03     | 0.04     | 0.05     | 0.06     | 0.12              | 0.16              | 0.13     | 0.17     |
|                   | 5      | 0.09       | 0.11       | 0.26       | 0.11       | 0.25       | 0.35       | 0.28       | 0.30       | 0.58       | 0.23       | 0.24       | 0.27       | 0.27       | 0.04     | 0.05     | 0.06     | 0.06     | 0.44              | 0.39              | 0.19     | 0.25     |
| $S = 8, L = 40$   | 0.05   | 0.1        | 0.11       | 0.11       | 0.11       | 0.12       | 0.25       | 0.31       | 0.36       | 0.34       | 0.29       | 0.36       | 0.27       | 0.28       | 0.04     | 0.06     | 0.07     | 0.05     | 0.17              | 0.23              | 0.25     | 0.35     |
|                   | 0.5    | 0.11       | 0.13       | 0.13       | 0.12       | 0.12       | 0.30       | 0.32       | 0.33       | 0.35       | 0.27       | 0.37       | 0.28       | 0.29       | 0.03     | 0.05     | 0.07     | 0.06     | 0.17              | 0.23              | 0.22     | 0.31     |
|                   | 5      | 0.12       | 0.17       | 0.31       | 0.15       | 0.27       | 0.29       | 0.33       | 0.28       | 0.6        | 0.25       | 0.19       | 0.27       | 0.25       | 0.04     | 0.06     | 0.06     | 0.09     | 0.45              | 0.43              | 0.29     | 0.30     |
| $S = 8, L = 160$  | 0.05   | 0.05       | 0.06       | 0.06       | 0.06       | 0.07       | 0.20       | 0.26       | 0.26       | 0.49       | 0.21       | 0.29       | 0.20       | 0.29       | 0.02     | 0.04     | 0.04     | 0.03     | 0.08              | 0.11              | 0.11     | 0.16     |
|                   | 0.5    | 0.06       | 0.07       | 0.07       | 0.06       | 0.07       | 0.24       | 0.26       | 0.26       | 0.49       | 0.18       | 0.28       | 0.17       | 0.26       | 0.03     | 0.04     | 0.05     | 0.04     | 0.09              | 0.10              | 0.11     | 0.16     |
|                   | 5      | 0.07       | 0.12       | 0.28       | 0.11       | 0.25       | 0.34       | 0.31       | 0.29       | 1.27       | 0.23       | 0.24       | 0.28       | 0.25       | 0.04     | 0.04     | 0.06     | 0.10     | 0.42              | 0.31              | 0.15     | 0.21     |
| $\theta = 0.01$   |        |            |            |            |            |            |            |            |            |            |            |            |            |            |          |          |          |          |                   |                   |          |          |
| $S = 2, L = 40$   | 0.05   | 0.16       | 0.19       | 0.17       | 0.19       | 0.18       | 0.23       | 0.28       | 0.28       | 0.33       | 0.26       | 0.32       | 0.27       | 0.30       | 0.02     | 0.03     | 0.04     | 0.03     | 0.13              | 0.20              | 0.24     | 0.27     |
|                   | 0.5    | 0.15       | 0.18       | 0.21       | 0.19       | 0.18       | 0.27       | 0.28       | 0.26       | 0.47       | 0.29       | 0.31       | 0.29       | 0.29       | 0.03     | 0.04     | 0.04     | 0.04     | 0.15              | 0.18              | 0.24     | 0.31     |
|                   | 5      | 0.14       | 0.14       | 0.30       | 0.18       | 0.28       | 0.33       | 0.32       | 0.33       | 0.98       | 0.29       | 0.26       | 0.34       | 0.26       | 0.04     | 0.05     | 0.07     | 0.09     | 0.43              | 0.41              | 0.27     | 0.33     |
| $S = 2, L = 160$  | 0.05   | 0.08       | 0.09       | 0.11       | 0.09       | 0.1        | 0.11       | 0.19       | 0.17       | 0.36       | 0.18       | 0.35       | 0.20       | 0.29       | 0.01     | 0.02     | 0.03     | 0.02     | 0.07              | 0.07              | 0.12     | 0.15     |
|                   | 0.5    | 0.09       | 0.1        | 0.11       | 0.09       | 0.11       | 0.14       | 0.16       | 0.20       | 0.49       | 0.16       | 0.38       | 0.21       | 0.27       | 0.01     | 0.02     | 0.03     | 0.04     | 0.07              | 0.10              | 0.12     | 0.15     |
|                   | 5      | 0.08       | 0.09       | 0.24       | 0.09       | 0.21       | 0.34       | 0.30       | 0.34       | 0.80       | 0.31       | 0.31       | 0.39       | 0.26       | 0.04     | 0.04     | 0.07     | 0.06     | 0.30              | 0.35              | 0.17     | 0.19     |
| $S = 8, L = 40$   | 0.05   | 0.08       | 0.07       | 0.08       | 0.08       | 0.09       | 0.21       | 0.34       | 0.25       | 0.44       | 0.22       | 0.35       | 0.26       | 0.29       | 0.02     | 0.03     | 0.04     | 0.04     | 0.09              | 0.13              | 0.20     | 0.26     |
|                   | 0.5    | 0.08       | 0.1        | 0.10       | 0.09       | 0.09       | 0.24       | 0.27       | 0.25       | 0.62       | 0.24       | 0.36       | 0.25       | 0.28       | 0.03     | 0.04     | 0.04     | 0.04     | 0.12              | 0.15              | 0.22     | 0.29     |
|                   | 5      | 0.14       | 0.15       | 0.30       | 0.16       | 0.27       | 0.35       | 0.31       | 0.37       | 1.05       | 0.22       | 0.31       | 0.26       | 0.27       | 0.05     | 0.05     | 0.08     | 0.1      | 0.41              | 0.40              | 0.27     | 0.32     |
| $S = 8, L = 160$  | 0.05   | 0.03       | 0.04       | 0.04       | 0.04       | 0.04       | 0.12       | 0.17       | 0.17       | 0.31       | 0.14       | 0.23       | 0.14       | 0.18       | 0.01     | 0.02     | 0.02     | 0.02     | 0.04              | 0.05              | 0.11     | 0.13     |
|                   | 0.5    | 0.04       | 0.04       | 0.05       | 0.04       | 0.06       | 0.13       | 0.19       | 0.16       | 0.39       | 0.12       | 0.22       | 0.16       | 0.19       | 0.01     | 0.02     | 0.03     | 0.03     | 0.06              | 0.08              | 0.11     | 0.13     |
|                   | 5      | 0.11       | 0.15       | 0.28       | 0.15       | 0.25       | 0.35       | 0.27       | 0.33       | 1.29       | 0.18       | 0.27       | 0.22       | 0.21       | 0.05     | 0.03     | 0.08     | 0.1      | 0.32              | 0.28              | 0.15     | 0.18     |
| <b>Tree U</b>     |        |            |            |            |            |            |            |            |            |            |            |            |            |            |          |          |          |          |                   |                   |          |          |
| $\theta = 0.0025$ |        |            |            |            |            |            |            |            |            |            |            |            |            |            |          |          |          |          |                   |                   |          |          |
| $S = 2, L = 40$   | 0.05   | 0.20       | 0.21       | 0.21       | 0.21       | 0.22       | 0.35       | 0.27       | 0.27       | 0.42       | 0.29       | 0.27       | 0.32       | 0.27       | 0.05     | 0.05     | 0.06     | 0.06     | 0.21              | 0.35              | 0.32     | 0.29     |
|                   | 0.5    | 0.19       | 0.21       | 0.22       | 0.25       | 0.22       | 0.26       | 0.28       | 0.27       | 0.33       | 0.36       | 0.23       | 0.28       | 0.27       | 0.05     | 0.05     | 0.08     | 0.07     | 0.22              | 0.29              | 0.30     | 0.38     |
|                   | 5      | 0.19       | 0.20       | 0.24       | 0.21       | 0.28       | 0.26       | 0.26       | 0.29       | 0.26       | 0.27       | 0.17       | 0.22       | 0.23       | 0.05     | 0.05     | 0.07     | 0.06     | 0.38              | 0.64              | 0.35     | 0.36     |
| $S = 2, L = 160$  | 0.05   | 0.1        | 0.12       | 0.11       | 0.12       | 0.12       | 0.27       | 0.25       | 0.22       | 0.27       | 0.28       | 0.43       | 0.26       | 0.28       | 0.03     | 0.03     | 0.04     | 0.05     | 0.11              | 0.13              | 0.17     | 0.15     |
|                   | 0.5    | 0.1        | 0.12       | 0.11       | 0.13       | 0.12       | 0.25       | 0.27       | 0.17       | 0.36       | 0.27       | 0.41       | 0.29       | 0.37       | 0.03     | 0.04     | 0.04     | 0.05     | 0.15              | 0.17              | 0.16     | 0.16     |
|                   | 5      | 0.09       | 0.11       | 0.18       | 0.14       | 0.25       | 0.31       | 0.31       | 0.28       | 0.27       | 0.28       | 0.24       | 0.24       | 0.34       | 0.03     | 0.05     | 0.05     | 0.05     | 0.38              | 0.50              | 0.22     | 0.21     |
| $S = 8, L = 40$   | 0.05   | 0.12       | 0.12       | 0.11       | 0.13       | 0.12       | 0.27       | 0.27       | 0.30       | 0.36       | 0.33       | 0.35       | 0.30       | 0.38       | 0.05     | 0.04     | 0.07     | 0.07     | 0.18              | 0.19              | 0.29     | 0.27     |
|                   | 0.5    | 0.11       | 0.12       | 0.13       | 0.12       | 0.11       | 0.27       | 0.29       | 0.30       | 0.36       | 0.33       | 0.31       | 0.29       | 0.27       | 0.05     | 0.05     | 0.06     | 0.06     | 0.18              | 0.26              | 0.30     | 0.29     |
|                   | 5      | 0.12       | 0.14       | 0.25       | 0.17       | 0.29       | 0.27       | 0.29       | 0.27       | 0.24       | 0.30       | 0.23       | 0.26       | 0.41       | 0.05     | 0.06     | 0.07     | 0.06     | 0.42              | 0.52              | 0.42     | 0.36     |
| $S = 8, L = 160$  | 0.05   | 0.06       | 0.06       | 0.06       | 0.06       | 0.06       | 0.25       | 0.26       | 0.17       | 0.29       | 0.18       | 0.30       | 0.20       | 0.27       | 0.03     | 0.03     | 0.03     | 0.04     | 0.09              | 0.09              | 0.13     | 0.13     |
|                   | 0.5    | 0.05       | 0.07       | 0.07       | 0.07       | 0.07       | 0.26       | 0.27       | 0.17       | 0.27       | 0.20       | 0.32       | 0.20       | 0.31       | 0.03     | 0.03     | 0.04     | 0.04     | 0.10              | 0.12              | 0.14     | 0.16     |
|                   | 5      | 0.07       | 0.11       | 0.22       | 0.12       | 0.26       | 0.31       | 0.29       | 0.26       | 0.24       | 0.36       | 0.30       | 0.27       | 0.33       | 0.03     | 0.06     | 0.05     | 0.04     | 0.36              | 0.42              | 0.19     | 0.18     |
| $\theta = 0.01$   |        |            |            |            |            |            |            |            |            |            |            |            |            |            |          |          |          |          |                   |                   |          |          |
| $S = 2, L = 40$   | 0.05   | 0.16       | 0.19       | 0.19       | 0.18       | 0.22       | 0.27       | 0.26       | 0.26       | 0.31       | 0.32       | 0.29       | 0.26       | 0.34       | 0.04     | 0.03     | 0.04     | 0.04     | 0.12              | 0.15              | 0.25     | 0.27     |
|                   | 0.5    | 0.14       | 0.20       | 0.20       | 0.17       | 0.19       | 0.27       | 0.29       | 0.26       | 0.28       | 0.38       | 0.27       | 0.28       | 0.36       | 0.03     | 0.03     | 0.04     | 0.05     | 0.15              | 0.17              | 0.25     | 0.29     |
|                   | 5      | 0.15       | 0.17       | 0.28       | 0.17       | 0.28       | 0.29       | 0.32       | 0.31       | 0.29       | 0.28       | 0.16       | 0.49       | 0.44       | 0.04     | 0.06     | 0.07     | 0.07     | 0.39              | 0.49              | 0.31     | 0.38     |
| $S = 2, L = 160$  | 0.05   | 0.09       | 0.09       | 0.1        | 0.09       | 0.1        | 0.18       | 0.17       | 0.15       | 0.25       | 0.22       | 0.31       | 0.21       | 0.26       | 0.02     | 0.02     | 0.02     | 0.03     | 0.07              | 0.09              | 0.12     | 0.14     |
|                   | 0.5    | 0.08       | 0.08       | 0.1        | 0.09       | 0.1        | 0.16       | 0.18       | 0.13       | 0.23       | 0.19       | 0.29       | 0.20       | 0.30       | 0.02     | 0.02     | 0.02     | 0.03     | 0.09              | 0.11              | 0.13     | 0.15     |
|                   | 5      | 0.07       | 0.08       | 0.19       | 0.08       | 0.20       | 0.32       | 0.31       | 0.30       | 0.28       | 0.19       | 0.29       | 0.67       | 0.54       | 0.03     | 0.05     | 0.04     | 0.05     | 0.33              | 0.34              | 0.19     | 0.22     |
| $S = 8, L = 40$   | 0.05   | 0.08       | 0.08       | 0.08       | 0.1        | 0.09       | 0.27       | 0.25       | 0.20       | 0.31       | 0.27       | 0.29       | 0.25       | 0.27       | 0.03     | 0.03     | 0.03     | 0.04     | 0.11              | 0.13              | 0.23     | 0.28     |
|                   | 0.5    | 0.07       | 0.08       | 0.09       | 0.08       | 0.09       | 0.27       | 0.27       | 0.21       | 0.37       | 0.24       | 0.34       | 0.26       | 0.36       | 0.03     | 0.04     | 0.04     | 0.05     | 0.13              | 0.16              | 0.23     | 0.28     |
|                   | 5      | 0.16       | 0.16       | 0.27       | 0.17       | 0.30       | 0.29       | 0.30       | 0.30       | 0.29       | 0.24       | 0.26       | 0.36       | 0.53       | 0.04     | 0.07     | 0.06     | 0.08     | 0.40              | 0.43              | 0.28     | 0.37     |
| $S = 8, L = 160$  | 0.05   | 0.04       | 0.04       | 0.05       | 0.04       | 0.04       | 0.17       | 0.16       | 0.13       | 0.22       | 0.14       | 0.24       | 0.16       | 0.21       | 0.02     | 0.02     | 0.02     | 0.03     | 0.05              | 0.07              | 0.11     | 0.15     |
|                   | 0.5    | 0.05       | 0.04       | 0.06       | 0.05       | 0.05       | 0.19       | 0.16       | 0.13       | 0.23       | 0.15       | 0.21       | 0.16       | 0.30       | 0.02     | 0.02     | 0.02     | 0.03     | 0.05              | 0.08              | 0.11     | 0.15     |
|                   | 5      | 0.12       | 0.15       | 0.25       | 0.15       | 0.27       | 0.28       | 0.30       | 0.27       | 0.26       | 0.19       | 0.22       | 0.35       | 0.58       | 0.03     | 0.06     | 0.04     | 0.31     | 0.07              | 0.35              | 0.17     | 0.20     |

## Supplementary text. MS Simulation Scripts and BPP Control Files

### A01 Species tree estimation

#### *MS simulation scripts*

```
Tree B
ms 10 L -r rho 500 -T -I 5 2 2 2 2 2 -ej 4.7 2 1 -ej 4.8 3 1 -ej 4.8 4 5 -ej 5 5 1|grep -v
// >treefile
seq-gen -mHKY -l 500 -s theta -p 200 <treefile >seqfile.txt

Tree U
ms 10 L -r rho 500 -T -I 5 2 2 2 2 2 -ej 4.4 2 1 -ej 4.6 3 1 -ej 4.8 4 1 -ej 5 5 1|grep -v
// >treefile
seq-gen -mHKY -l 500 -s theta -p 200 <treefile >seqfile.txt
```

#### *bpp control file*

```
seed = -1
seqfile = seqfile.txt
Imapfile = ../../Imap.txt
outfile = out.txt
mcmcfile = mcmc.txt

speciesdelimitation = 0
speciestree = 1
speciesmodelprior = 1
species&tree = 5   A B C D E
                  2 2 2 2 2
                  8 8 8 8 8
*   (((A, B), C), (D, E)); #treeB
*   (((((A, B), C), D), E); #treeU

usedata = 1
nloci = 160 #40
cleandata = 0
thetaprior = 3 0.02 # 3 0.005 # e没了
tauprior = 3 0.1 # 3 0.025
*phiprior = 0.3 0.7
finetune = 1: 21.06 .0002 .0003 .00001 .2 .01 .01 .01
print = 1 0 0 0
burnin = 32000
sampfreq = 5
nsample = 100000
```

## A11 Species delimitation

### *MS simulation scripts*

```
Tree D (Deep)
ms 10 L -r rho 500 -T -I 5 2 2 2 2 2 -ej 1E-50 2 1 -ej 1E-50 4 5 -ej 4.8 3 1 -ej 5 5 1|grep
-v // >treefile
seq-gen -mHKY -l 500 -s theta -p 200 <treefile >seqfile.txt

Tree S (Shallow)
ms 10 L -r rho 500 -T -I 5 2 2 2 2 2 -ej 1E-50 2 1 -ej 1E-50 4 5 -ej 0.5 3 1 -ej 1 5 1|grep
-v // >treefile
seq-gen -mHKY -l 500 -s theta -p 200 <treefile >seqfile.txt
```

### *bpp control file*

```
seed = -1
seqfile = seqfile.txt
Imapfile = ../../Imap.txt
outfile = out.txt
mcmcfile = mcmc.txt

speciesdelimitation = 1 0 2
speciestree = 1
speciesmodelprior = 1
species&tree = 5   A B C D E
                  2 2 2 2 2
*                  8 8 8 8 8
                  ((A, B), C), ( D, E)) ;

usedata = 1
nloci = 160 #40
cleandata = 0
thetaprior = 3 0.02 # 3 0.005
tauprior = 3 0.1
#Deep Tree: theta = 0.01 ; tauprior = 3 0.1; theta = 0.025, tauprior = 3 0.025
#Shallow Tree: theta = 0.01; tauprior = 3 0.02; theta = 0.025, tauprior = 3 0.005

finetune = 1: 21.06 .0002 .0003 .00001 .2 .01 .01 .01
print = 1 0 0 0
burnin = 32000
sampfreq = 5
nsample = 100000
```

## A00 Estimation of population parameters under the MSci model

### MS simulation scripts

```
Tree B
ms 10 L -r rho 500 -T -I 5 2 2 2 2 2 -es 1 3 0.7 -es 1 5 0.8 -ej 1.0001 6 2 -ej 1.0001 7 4
-en 1.0002 2 1 -en 1.0002 3 1 -en 1.0002 4 1 -en 1.0002 5 1 -ej 3 2 1 -ej 4 3 1 -ej 4.5 4 5
-ej 5 5 1|grep -v // >treefile
seq-gen -mHKY -l 500 -s theta -p 200 <treefile >seqfile.txt
# ms 40 L -r rho 500 -T -I 5 8 8 8 8 8 for S = 8

Tree U
ms 10 L -r rho 500 -T -I 5 2 2 2 2 2 -es 1 3 0.7 -es 1 5 0.8 -ej 1.0001 6 2 -ej 1.0001 7 4
-en 1.0002 2 1 -en 1.0002 3 1 -en 1.0002 4 1 -en 1.0002 5 1 -ej 2.5 2 1 -ej 3 3 1 -ej 4 4 1
-ej 5 5 1|grep -v // >treefile
seq-gen -mHKY -l 500 -s theta -p 200 <treefile >seqfile.txt
# ms 40 L -r rho 500 -T -I 5 8 8 8 8 8 for S = 8
```

### bpp control file

```
seed = -1
seqfile = seqfile.txt
Imapfile = Imap.txt
outfile = out.txt
mcmcfile = mcmc.txt

speciesdelimitation = 0
speciestree = 0
speciesmodelprior = 1
species&tree = 5 A B C D E
                2 2 2 2 2
*                8 8 8 8 8
(((A,(B,(C)Y[&tau-parent=no])X)T,Y[&tau-parent=yes])S, (( D, (E)W[&tau-parent=no])Z,W[&tau-
parent=yes])U)R ; #treeB
*(((A, (B, (C) Y[&tau-parent=no]) X) U, Y[&tau-parent=yes]) T, (D, (E) W[&tau-parent=no])
Z) S, W[&tau-parent=yes]) R; #treeU

usedata = 1
nloci = 160 #40
cleandata = 0
thetaprior = 3 0.02 e # 3 0.005 e
tauprior = 3 0.1 # 3 0.025
phiprior = 0.3 0.7
finetune = 1: 21.06 .0002 .0003 .00001 .2 .01 .01 .01
print = 1 0 0 0
burnin = 32000
sampfreq = 5
nsample = 100000
```
